# Supplementary material for: The Extraordinary Case of a Woman with a 30-Year-Long Diffuse Leishmaniasis Cured with One Single Ampoule of Intranasal Pentavalent Antimoniate
Source: MDPI journal article supplement (doi:10.3390/pathogens12070890), 2023-06-29
Supplement: s1 [file s1]

Supplementary Table. Drug susceptibility of parasites isolated from the patient in two occasions. Half-maximal concentration (EC<sub>50</sub>) and 95% confidence interval.

|                                                | <b>M2269<sup>a</sup></b> | <b>M2506<sup>b</sup></b> | <b>M2874<sup>c</sup></b> |
|------------------------------------------------|--------------------------|--------------------------|--------------------------|
|                                                | EC <sub>50</sub>         | EC <sub>50</sub>         | EC <sub>50</sub>         |
|                                                | (95% CI) <sup>d</sup>    | (95% CI)                 | (95% CI)                 |
| Meglumine antimoniate<br>( µg/ml) <sup>e</sup> | 391.2<br>(264.5 – 578.7) | ND <sup>g</sup>          | 401.4<br>(339.0 – 475.4) |
| Amphotericin B ( µM) <sup>f</sup>              | 0.034<br>(0.031 – 0.038) | 0.071<br>(0.062 – 0.081) | 0.068<br>(0.059 – 0.079) |
| Miltefosine ( µM) <sup>f</sup>                 | 19.55<br>(17.61 – 21.70) | 47.05<br>(31.08 – 54.53) | 50.54<br>(46.38 – 55.07) |
| Pentamidine ( µM) <sup>f</sup>                 | 5.68<br>(5.11 – 6.32)    | 3.86<br>(3.32 – 4.48)    | 3.90<br>(2.67 – 5.69)    |

<sup>a</sup> Type strain *L. amazonensis* MHOM/BR/1973/M2269. <sup>b</sup> *L. amazonensis* isolate obtained from the patient in June 2008 (MHOM/BR/2008/2506). <sup>c</sup> *L. amazonensis* isolate obtained from the patient in December 2008 (MHOM/BR/2008/2506). <sup>d</sup> 95% confidence interval. <sup>e</sup> Assays performed against intracellular amastigotes. <sup>f</sup> Assays performed against promastigotes.

<sup>g</sup> Not determined.
